# Supplementary material
Source: PubMed Central journal article supplement (PMC3262062)
Supplement: NIHMS339870-supplement-Supp_Figure_S1-S3.pdf [file NIHMS339870-supplement-Supp_Figure_S1-S3.pdf]

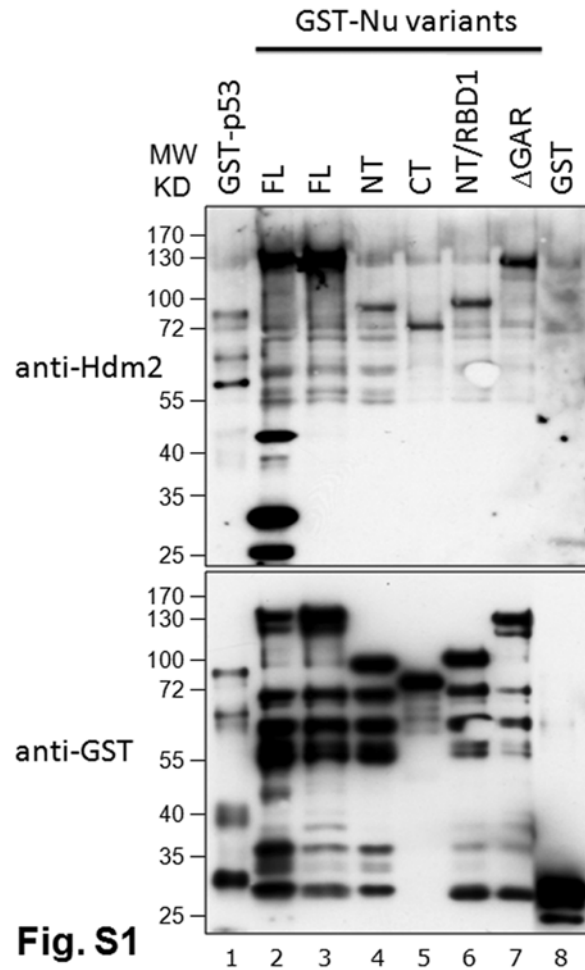

**Fig. S1, Far-Western analyses of direct nucleolin-Hdm2 interactions.** Upper panel, Equivalent amounts (400 ng) of GST-tagged nucleolin FL (lanes 2 and 3) or nucleolin domains (lanes 4 to 7) were subjected to SDS-PAGE. As negative control for the nucleolin-Hdm2 interactions, GST alone (lane 8) was used. GST-tagged p53 (lane 1) served as a positive control. The separated proteins were then electrotransferred to a nitrocellulose membrane for Far-Western analysis. The membrane was probed with purified Hdm2 protein (0.2  $\mu$ g/ml), as described in Materials and Methods, and the bound Hdm2 detected by a monoclonal anti-Hdm2 antibody (SMP14). This figure, along with Fig. 2, indicates that both cleaved p53 and GST-

tagged p53 associate with Hdm2 in our Far-Western analyses. **Lower panel**, Equivalent loading of the GST-nucleolin fusion proteins was confirmed by running a parallel blot and probing directly with anti-GST antibodies. The multiple lower molecule bands indicate degraded protein fragments. These data indicate that both the nucleolin NT and RBD domains can independently bind Hdm2.

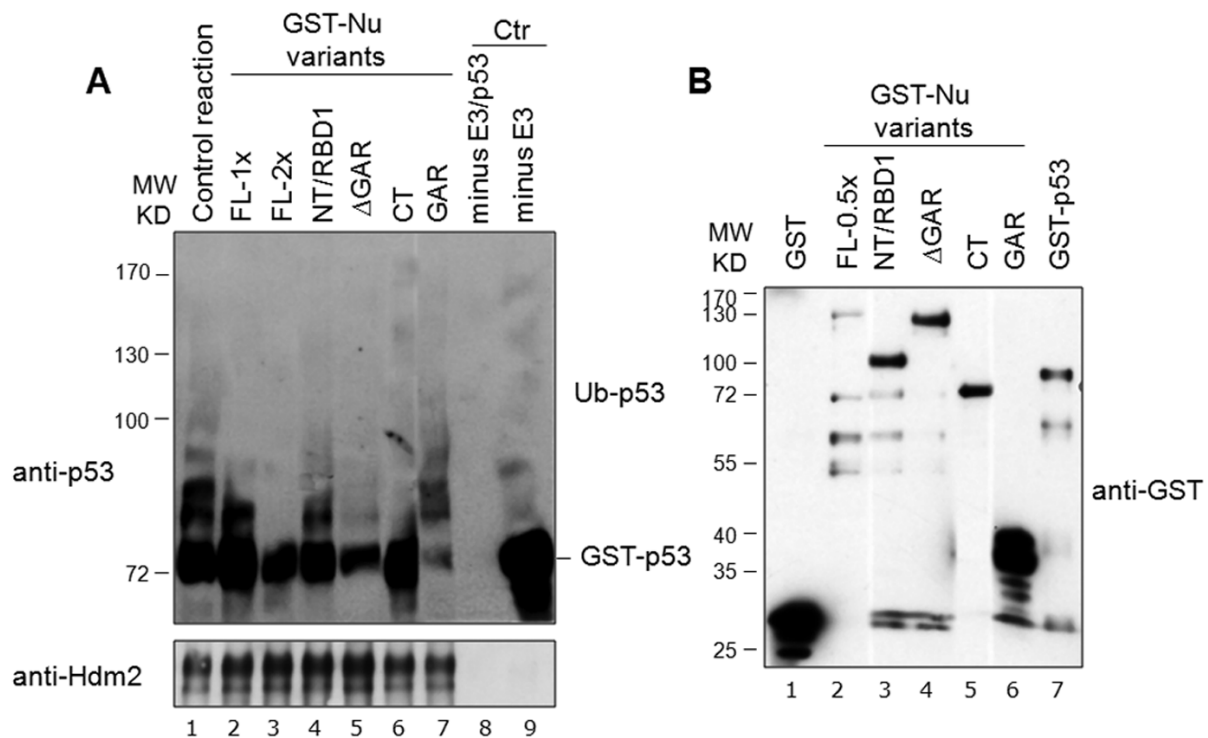

**Fig. S2**

**Fig. S2, p53 ubiquitination using GST-nucleolin domains in vitro.** The control reaction contained all the required components for ubiquitination in vitro reactions, including Hdm2-FL as the E3-ligase (lane 1) indicates p53-polyubiquitinated products. Upon increasing amounts of GST-nucleolin FL (lanes 2 and 3; 1x= 200ng), there is a clear decrease in ubiquitinated p53. There is no significant difference in polyubiquitinated-p53 with nucleolin-NT (compare lane 4 vs. 2). The constructs lacking GAR domain (ΔGAR) as well as the CT domain (that contained all

the RBDs and GAR) show less polyubiquitinated-p53 (lane 5, 6) while the presence of GAR-domain leads to a shift to more polyubiquitinated-p53 (lane 7). Controls without p53 and Hdm2 (lane 8) as well as only p53 control (lane 9) are also shown. These data indicates that nucleolin-variants that contained the RBDs or lacked GAR inhibit p53-polyubiquitination. The outcome is unchanged when nucleolin is expressed and purified by multiple approaches (from yeast as GST-tagged or from cells as GFP-tagged, Fig. 7B).

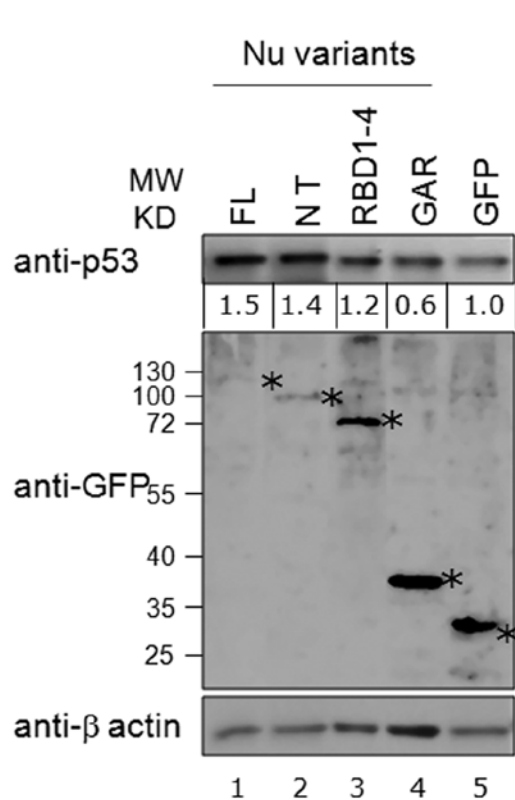

**Fig. S3**

p53 protein level is also reduced.

**S3, Effects of nucleolin domain expression on p53 levels.** Constructs expressing various GFP-tagged nucleolin domains were transfected into SJSA cells. Post-transfection (36 h), endogenous p53 was detected by Western using an anti-p53 (DO-1) antibody, while the expression level of each nucleolin domain was detected using anti-GFP. β-actin served as a loading control. The level of p53 protein (denoted below the p53 Western blot) was normalized to β-actin expression, after quantitation with Image J software (NIH). Note that when the nucleolin expression is lower, the fold increase in
